# Supplementary material for: Phaseolus vulgaris Erythroagglutinin (PHA-E)-Positive Ceruloplasmin Acts as a Potential Biomarker in Pancreatic Cancer Diagnosis
Source: MDPI journal article supplement (doi:10.3390/cells11152453), 2022-08-08
Supplement: s1 [file s1]

Table S1. Patients' information.

| Group           | No. | Gender | Age | Lipase<br>(U/L) | Amylase<br>(U/L) | CA19-9<br>(U/mL) | Tumor location   | Tumor<br>stage | Histopathological<br>classification | Surgery | Metastasis |
|-----------------|-----|--------|-----|-----------------|------------------|------------------|------------------|----------------|-------------------------------------|---------|------------|
| <b>Figure 1</b> |     |        |     |                 |                  |                  |                  |                |                                     |         |            |
| <b>NC</b>       |     |        |     |                 |                  |                  |                  |                |                                     |         |            |
|                 | 1   | F*     | 42  |                 |                  |                  |                  |                |                                     |         |            |
|                 | 2   | M*     | 45  |                 |                  |                  |                  |                |                                     |         |            |
|                 | 3   | M*     | 47  |                 |                  |                  |                  |                |                                     |         |            |
|                 | 4   | M*     | 55  |                 |                  |                  |                  |                |                                     |         |            |
|                 | 5   | M*     | 56  |                 |                  |                  |                  |                |                                     |         |            |
|                 | 6   | F*     | 57  |                 |                  |                  |                  |                |                                     |         |            |
|                 | 7   | M*     | 35  |                 |                  |                  |                  |                |                                     |         |            |
|                 | 8   | F*     | 47  |                 |                  |                  |                  |                |                                     |         |            |
| <b>AP</b>       |     |        |     |                 |                  |                  |                  |                |                                     |         |            |
|                 | 9   | M*     | 35  | 1866            | 567              |                  |                  |                |                                     |         |            |
|                 | 10  | M*     | 70  | 4022            | 937              |                  |                  |                |                                     |         |            |
|                 | 11  | F*     | 30  | 5341            | 1971             |                  |                  |                |                                     |         |            |
|                 | 12  | F*     | 64  | 3971            | 2050             |                  |                  |                |                                     |         |            |
|                 | 13  | F*     | 58  | 5277            | 2288             |                  |                  |                |                                     |         |            |
|                 | 14  | F*     | 60  | 1252            | 292              |                  |                  |                |                                     |         |            |
|                 | 15  | M*     | 44  | 936             | 248              |                  |                  |                |                                     |         |            |
|                 | 16  | M*     | 46  | 1796            | 377              |                  |                  |                |                                     |         |            |
| <b>PC</b>       |     |        |     |                 |                  |                  |                  |                |                                     |         |            |
|                 | 17  | F*     | 47  |                 |                  | >1000            | Head of pancreas | 4              | -                                   | No      | Liver      |
|                 | 18  | M*     | 51  |                 |                  | >1000            | Head of pancreas | 4              | -                                   | No      | No         |

|                                         |    |    |       |                  |   |                             |     |                  |
|-----------------------------------------|----|----|-------|------------------|---|-----------------------------|-----|------------------|
| 19                                      | M* | 51 | >1000 | Head of pancreas | 4 | -                           | No  | No               |
| 20                                      | F* | 54 | >1000 | Head of pancreas | 4 | -                           | No  | Liver            |
| 21                                      | M* | 56 | >1000 | Head of pancreas | 4 | low grade<br>adenocarcinoma | Yes | Liver            |
| 22                                      | M* | 61 | >1000 | Tail of pancreas | 4 | -                           | No  | Liver,<br>spleen |
| 23                                      | F* | 67 | 421.1 | Head of pancreas | 4 | -                           | No  | Liver            |
| 24                                      | M* | 79 | >1000 | Head of pancreas | 3 | -                           | No  | No               |
| <b>Figure 4<br/>&amp;<br/>Figure S1</b> |    |    |       |                  |   |                             |     |                  |
| <b>NC</b>                               |    |    |       |                  |   |                             |     |                  |
| 1                                       | M  | 44 |       |                  |   |                             |     |                  |
| 2                                       | M  | 47 |       |                  |   |                             |     |                  |
| 3                                       | F  | 46 |       |                  |   |                             |     |                  |
| 4                                       | M  | 53 |       |                  |   |                             |     |                  |
| 5                                       | M  | 54 |       |                  |   |                             |     |                  |
| 6                                       | M  | 75 |       |                  |   |                             |     |                  |
| 7                                       | F  | 53 |       |                  |   |                             |     |                  |
| 8                                       | M  | 45 |       |                  |   |                             |     |                  |
| 9                                       | M  | 59 |       |                  |   |                             |     |                  |
| 10                                      | F  | 72 |       |                  |   |                             |     |                  |
| 11                                      | M  | 61 |       |                  |   |                             |     |                  |
| 12                                      | M  | 60 |       |                  |   |                             |     |                  |
| <b>AP</b>                               |    |    |       |                  |   |                             |     |                  |
| 13                                      | M  | 74 | 1146  | 148              |   |                             |     |                  |

|           |    |   |    |      |         |                              |   |                                                   |                |
|-----------|----|---|----|------|---------|------------------------------|---|---------------------------------------------------|----------------|
|           | 14 | F | 58 | 1728 | 166     |                              |   |                                                   |                |
|           | 15 | M | 63 | 2191 | 332     |                              |   |                                                   |                |
|           | 16 | F | 81 | 1294 | 1015    |                              |   |                                                   |                |
|           | 17 | M | 36 | 1815 | 235     |                              |   |                                                   |                |
|           | 18 | M | 85 | 3145 | 867     |                              |   |                                                   |                |
|           | 19 | M | 46 | 1796 | 447     |                              |   |                                                   |                |
|           | 20 | M | 66 | 617  | 173     |                              |   |                                                   |                |
|           | 21 | F | 42 | 719  | 213     |                              |   |                                                   |                |
|           | 22 | F | 16 | 803  | 131     |                              |   |                                                   |                |
|           | 23 | M | 79 | 788  | 330     |                              |   |                                                   |                |
|           | 24 | F | 86 | 762  | 182     |                              |   |                                                   |                |
| <b>PC</b> |    |   |    |      |         |                              |   |                                                   |                |
|           | 25 | F | 61 |      | 798.2   | Head of pancreas             | 2 | -                                                 | No No          |
|           | 26 | M | 71 |      | >1000   | Head of pancreas             | 4 | -                                                 | No No          |
|           | 27 | M | 69 |      | >1000   | -                            | 4 | High grade<br>pancreatic ductal<br>adenocarcinoma | Yes No         |
|           | 28 | F | 80 |      | 333.6   | Body of pancreas             | 4 | -                                                 | No Ovarium     |
|           | 29 | M | 51 |      | 69.4    | Body and tail of<br>pancreas | 2 | Low grade ductal<br>adenocarcinoma                | Yes Lymph node |
|           | 30 | M | 71 |      | >1000   | Body and tail of<br>pancreas | 4 | Low grade ductal<br>adenocarcinoma                | Yes Liver      |
|           | 31 | M | 63 |      | 3613.37 | Head of pancreas             | 2 | Medium/Low<br>grade ductal<br>adenocarcinoma      | Yes Lymph node |
|           | 32 | M | 58 |      | 3839.05 | -                            | 4 | Low grade ductal                                  | Yes Liver,     |

|    |   |    |          |                  |   |  |                                              |     |                     |
|----|---|----|----------|------------------|---|--|----------------------------------------------|-----|---------------------|
|    |   |    |          |                  |   |  | adenocarcinoma                               |     | peritoneum          |
| 33 | M | 48 | 492.99   | Tail of pancreas | 4 |  | adenocarcinoma                               | Yes | Peritoneum          |
| 34 | F | 78 | 68955.76 | -                | 4 |  | adenocarcinoma                               | Yes | Liver, lung         |
| 35 | F | 72 | 67.66    | -                | 3 |  | Low grade<br>adenocarcinoma                  | Yes | Lymph node<br>Liver |
| 36 | M | 70 | 177.6    | -                | 4 |  | Medium/Low<br>grade ductal<br>adenocarcinoma | Yes | Liver               |

F: female; M, male; NC, normal healthy individuals; AP, acute pancreatitis patients; PC, pancreatic cancer patients; \* used for sera pooling
