# Supplementary material for: Phaseolus vulgaris Erythroagglutinin (PHA-E)-Positive Ceruloplasmin Acts as a Potential Biomarker in Pancreatic Cancer Diagnosis
Source: MDPI journal article supplement (doi:10.3390/cells11152453), 2022-08-08
Supplement: s1 [file s1]

Table S3. The values of relative intensity in Figure 1-4.

|                  | NC            | AP            | PC            |
|------------------|---------------|---------------|---------------|
| <b>Figure 1a</b> |               |               |               |
| AAL              | 28.21 ± 4.16  | 36.82 ± 9.79  | 56.96 ± 9.45  |
| LCA              | 46.12 ± 4.52  | 55.42 ± 7.78  | 66.69 ± 11.58 |
| PHA-E            | 49.04 ± 6.92  | 67.15 ± 11.13 | 81.80 ± 11.90 |
| PHA-L            | 40.72 ± 7.85  | 51.88 ± 6.25  | 63.44 ± 6.69  |
| SNA              | 43.18 ± 10.71 | 55.63 ± 11.66 | 86.22 ± 12.15 |
| <b>Figure 1b</b> |               |               |               |
| AAL              | 35.58 ± 3.57  | 39.35 ± 1.04  | 45.18 ± 1.54  |
| LCA              | 51.77 ± 2.91  | 59.57 ± 2.39  | 68.45 ± 0.80  |
| PHA-E            | 32.27 ± 0.83  | 33.68 ± 1.24  | 38.59 ± 1.63  |
| PHA-L            | 21.84 ± 0.70  | 28.83 ± 0.12  | 32.12 ± 1.55  |
| SNA              | 53.44 ± 4.79  | 71.74 ± 7.62  | 87.71 ± 5.57  |
| <b>Figure 2c</b> |               |               |               |
| Bis              | 2.07 ± 0.12   | 2.64 ± 0.15   | 3.14 ± 0.13   |
| Man              | 2.90 ± 0.14   | 3.79 ± 0.24   | 3.40 ± 0.10   |
| Fuc              | 30.24 ± 2.11  | 33.49 ± 0.78  | 36.77 ± 0.61  |
| Neu              | 73.37 ± 2.11  | 70.37 ± 0.90  | 66.93 ± 0.23  |
| <b>Figure 3b</b> |               |               |               |
| Cp               | 19.26 ± 3.06  | 59.33 ± 7.55  | 87.33 ± 8.49  |
| Tf               | 9.91 ± 1.83   | 21.38 ± 2.97  | 25.38 ± 4.75  |
| Apo-E            | 8.71 ± 1.64   | 20.93 ± 2.84  | 46.83 ± 3.33  |
| <b>Figure 4b</b> |               |               |               |
| Cp               | 10.64 ± 2.25  | 18.01 ± 4.02  | 16.87 ± 3.14  |
| Apo-E            | 4.45 ± 3.16   | 16.68 ± 5.75  | 17.88 ± 7.04  |
| <b>Figure 4d</b> |               |               |               |
| Cp               | 18.72 ± 8.72  | 37.64 ± 13.65 | 50.99 ± 17.63 |
| Apo-E            | 1.81 ± 1.45   | 24.25 ± 18.65 | 17.38 ± 10.32 |
