# Supplementary material for: Phaseolus vulgaris Erythroagglutinin (PHA-E)-Positive Ceruloplasmin Acts as a Potential Biomarker in Pancreatic Cancer Diagnosis
Source: MDPI journal article supplement (doi:10.3390/cells11152453), 2022-08-08
Supplement: s1 [file s1]

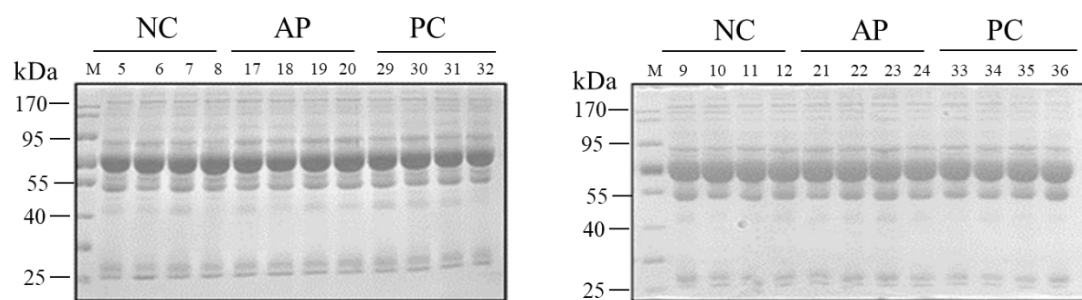

Figure S1. CBB staining of serum proteins from healthy individuals (NC, 5-12), acute pancreatitis (AP, 17-24) and pancreatic cancer (PC, 29-36) patients.
