# Supplementary material for: Phaseolus vulgaris Erythroagglutinin (PHA-E)-Positive Ceruloplasmin Acts as a Potential Biomarker in Pancreatic Cancer Diagnosis
Source: MDPI journal article supplement (doi:10.3390/cells11152453), 2022-08-08
Supplement: s1 [file s1]

Table S2. Lectins and their primary sugar specificity

| Lectin                                      | Abbreviations | Source             | Primary sugar specificity                                                         |
|---------------------------------------------|---------------|--------------------|-----------------------------------------------------------------------------------|
| <i>Aleuria aurantia</i> lectin              | AAL           | Aleuria Aurantia   | Broad specificity to fucosylated glycans                                          |
| <i>Lens culinaris</i> agglutinin            | LCA           | Lens culinaris     | Fuca1-6 GlcNAc, $\alpha$ -Man, $\alpha$ -Glc                                      |
| <i>Sambucus nigra</i> agglutinin            | SNA           | Elderberry bark    | Sia $\alpha$ 2-6Gal/GalNAc                                                        |
| <i>Phaseolus vulgaris</i> Erythroagglutinin | PHA-E         | Phaseolus vulgaris | Bisecting GlcNAc, biantennary complex-type<br><br><i>N</i> -glycan with outer Gal |
| <i>Phaseolus vulgaris</i> Leucoagglutinin   | PHA-L         | Phaseolus vulgaris | Tri/tetra-antennary complex-type <i>N</i> -glycan                                 |
